# Supplementary material
Source: PubMed Central journal article supplement (PMC6460404)
Supplement: 750517_supplementary_material.pdf [file 750517_supplementary_material.pdf]

Supplementary Table 1 Odds of ACE-R<82 in patients with variable compared to patients without the variable

| Variable                                                            | Age-adjusted                           | Age & NART (at 1-3 months) adjusted |
|---------------------------------------------------------------------|----------------------------------------|-------------------------------------|
| <i>OR of ACE-R&lt;82 at 1-3 months- (95% CI) and p value, n=157</i> |                                        |                                     |
| Male sex                                                            | 1.2 (0.55,2.7) p = 0.64                | 1.58 (0.66,3.94) p = 0.31           |
| Number of years of education*                                       | <b>0.68 (0.48,0.87) p = 0.01</b>       | NA                                  |
| Worst NIHSS score                                                   | 1.2 (0.89,1.61) p = 0.23               | <b>1.42 (1.01, 2.00) p = 0.04</b>   |
| BDI at 1-3 months                                                   | <b>1.04 (1.00,1.09) p = 0.04</b>       | 1.03 (0.98,1.08) p = 0.21           |
| NART at 1-3 months*                                                 | <b>0.91 (0.87,0.95) p = &lt;0.01</b>   | NA                                  |
| Non-lacunar stroke subtype                                          | 0.69 (0.31-1.51),p= 0.36               | 0.62 (0.25,1.47) p = 0.28           |
| Total Fazekas score                                                 | 0.92 (0.7,1.19) p = 0.51               | 1.07 (0.79,1.45) p = 0.65           |
| Total no of microbleeds                                             | 0.99 (0.89,1.07) p = 0.81              | 1.02 (0.90,1.15) p = 0.73           |
| Atrophy score                                                       | 0.94 (0.77,1.15) p = 0.57              | 0.93 (0.74,1.15) p = 0.51           |
| Enlarged periventricular spaces                                     | 0.9 (0.76,1.05) p = 0.19               | 0.92 (0.76,1.10) p = 0.39           |
| Total SVD score                                                     | 1.0 (0.72,1.38) p = 0.99               | 1.17 (0.81,1.68) p = 0.38           |
| <i>OR of ACE-R&lt;82 at 1 year - (95% CI) and p value, n=151</i>    |                                        |                                     |
| Male sex                                                            | 0.85 (0.37,2) p = 0.7                  | 2.10 (0.69-7.25)p=0.20              |
| Number of years of education*                                       | <b>0.28 (0.13,0.52) p = &lt;0.001</b>  | NA                                  |
| Worst NIHSS score                                                   | 1 (0.71,1.38) p = 1                    | 1.17 (0.75,1.77) p = 0.47           |
| BDI at 1-3 months                                                   | 1.03 (0.98,1.07) p = 0.23              | 1.01 (0.95,1.07) p = 0.23           |
| NART at 1-3 months*                                                 | <b>0.92 (0.88,0.96) p = &lt;0.0001</b> | NA                                  |
| Non-lacunar stroke subtype                                          | 0.62 (0.26,1.42), p=0.25               | 0.47 (0.15,1.38), p=0.18            |
| Total Fazekas score (Index Scan)                                    | <b>1.32 (1.00,1.74) p = 0.047</b>      | <b>1.58 (1.05,2.44) p = 0.03</b>    |
| Total no of microbleeds (Index Scan)                                | 1 (0.9,1.08) p = 0.97                  | 1.05 (0.93,1.16) p = 0.29           |
| Atrophy score (Index Scan)                                          | 1.02 (0.81,1.27) p = 0.85              | 1.06 (0.79,1.41) p = 0.68           |
| EPVS (Index Scan)                                                   | 1.07 (0.88,1.3) p = 0.47               | 1.15 (0.91,1.44) p = 0.24           |
| Total SVD score (Index Scan)                                        | <b>1.46 (1.06,2.04) p = 0.02</b>       | <b>1.68 (1.05,2.76) p=0.03</b>      |
| mRS at 1 year                                                       | 1.41 (0.92,2.19) p = 0.12              | 1.57 (0.89,2.84) p = 0.12           |
| Stroke during follow-up                                             | 3.23 (0.87,11.24) p = 0.07             | 1.69 (0.23,9.60) p = 0.57           |
| Stroke or TIA during follow-up                                      | 2.12 (0.61,6.57) p = 0.21              | 1.34 (0.20,6.77) p = 0.74           |

\*We did not include education and NART in the same model to avoid multicollinearity.

Supplementary Figure 1 Updated systematic review of cognitive impairment in lacunar versus cortical stroke

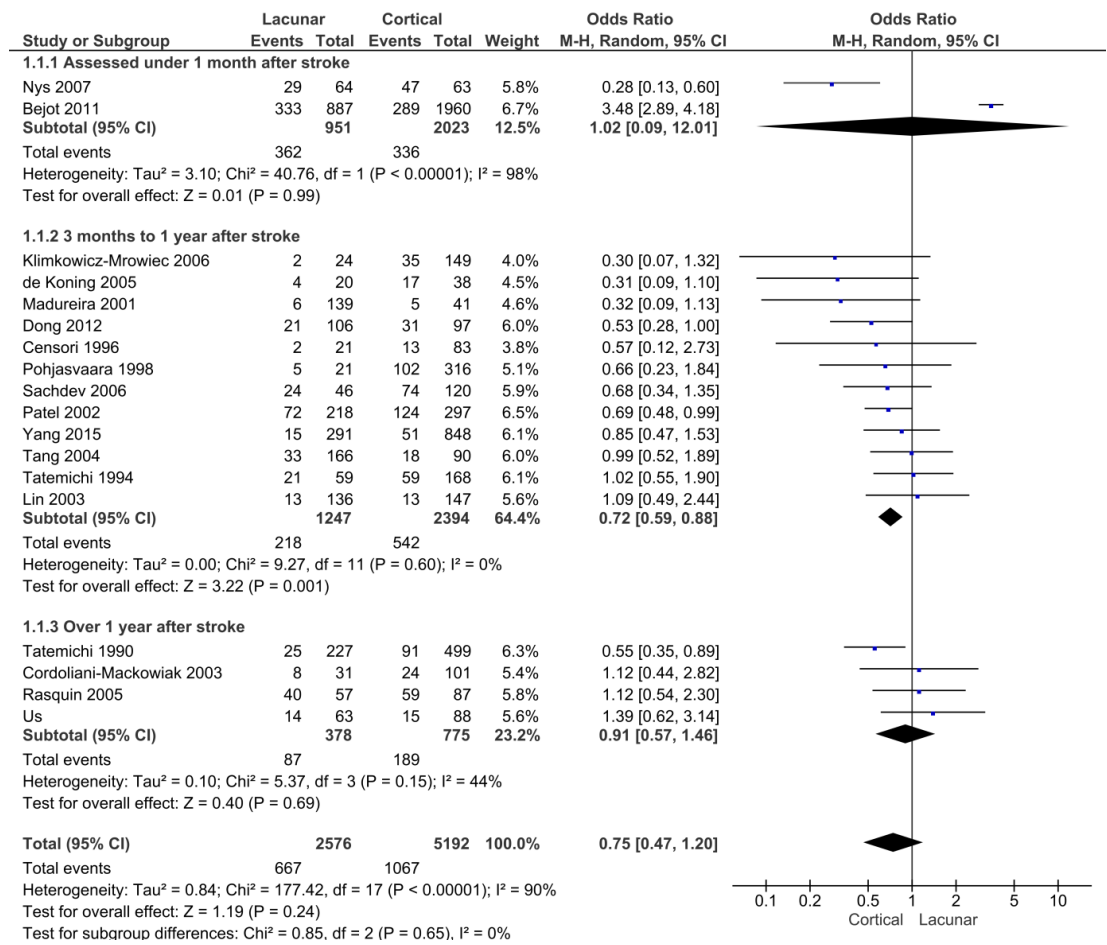

Supplementary Table 2 Studies in the updated systematic review

| <i>Reference</i>          | <i>Setting</i>       | <i>Total patients consented / total tested</i> | <i>Timing of tests post-stroke</i> | <i>Test done</i>       | <i>Sub-typing</i> | <i>Primary outcome</i> | <i>Results</i>                                                    |
|---------------------------|----------------------|------------------------------------------------|------------------------------------|------------------------|-------------------|------------------------|-------------------------------------------------------------------|
| Nys 2007                  | Hospital Netherlands | 190/168 <sup>A</sup>                           | 3 weeks                            | NP <sup>B</sup>        | Imaging           | MCI <sup>C</sup>       | 29/64 (45%)<br>Lacunar<br>47/63 (75%)<br>Non-lacunar              |
| Sachdev 2006              | Hospital Australia   | 210/170 <sup>A</sup>                           | 3-6 months                         | NP                     | Risk factor       | Dementia or MCI        | 24/46 (52%)<br>Lacunar<br>74/120 (62%)<br>Non-lacunar             |
| De Koning 2005            | Hospital Netherlands | 130/121 <sup>A</sup>                           | 3-9 months                         | NP                     | Imaging           | Dementia               | 4/20 (20%)<br>Lacunar<br>17/38 (45%)<br>Non-lacunar               |
| Censori 1996              | Hospital Italy       | 121/110 <sup>F</sup>                           | 3-4 Months                         | NP & MMSE <sup>G</sup> | Clinical          | Dementia               | 2/21 (10%)<br>Lacunar<br>13/83 (16%)<br>Non-lacunar               |
| Tatemichi 1990            | Hospital USA         | 927/726                                        | 2 years                            | Clinical impression    | Risk factor       | Dementia               | 25/227 (11%)<br>Lacunar<br>91/499 (18%)<br>Non-lacunar            |
| Bejot 2011                | Community France     | 3948/3201 <sup>A</sup>                         | 1 month                            | NP                     | Risk factor       | Dementia               | 333/887 (38%)<br>Lacunar<br>289/1960 (15%)<br>Non-lacunar         |
| Lin 2003                  | Hospital Taiwan      | 353/283                                        | 3 months                           | NP                     | Risk factor       | Dementia               | 13/136 (10%)<br>Lacunar<br>13/147 (9%)<br>Non-lacunar             |
| Patel 2002,2003           | Community UK         | 1454/654 <sup>A</sup>                          | 3 months                           | MMSE                   | Clinical          | MMSE < 24              | 72/218 (33%)<br>Lacunar<br>124/297 (42%)<br>Non-lacunar           |
| Cordoliani-Mackowiak 2003 | Hospital France      | 132/88 <sup>H</sup>                            | Up to 3 years                      | NP                     | Risk factor       | Dementia               | 8/31 (26%)<br>Lacunar<br>24/101 (24%)<br>Non-lacunar              |
| Rasquin 2004,2005,2007    | Hospital Netherlands | 176/144                                        | 1 years.                           | NP                     | Imaging           | MCI or Dementia        | 40/57 (70%)<br>Lacunar<br>59/87 (68%)<br>Non-lacunar <sup>I</sup> |
| Pohjasvaara 1998          | Hospital Finland     | 451/337                                        | 3 months                           | NP                     | Risk factor       | Dementia               | 5/21 (24%)<br>Lacunar<br>102/316 (32%)<br>Non-lacunar             |

| <i>Reference</i>        | <i>Setting</i>        | <i>Total patients consented / total tested</i> | <i>Timing of tests post-stroke</i> | <i>Test done</i>                         | <i>Sub-typing</i> | <i>Primary outcome</i> | <i>Results</i>                                                      |
|-------------------------|-----------------------|------------------------------------------------|------------------------------------|------------------------------------------|-------------------|------------------------|---------------------------------------------------------------------|
| Tang 2004               | Hospital China        | 484/280 <sup>A</sup>                           | 3 months                           | MMSE                                     | Imaging           | Dementia               | 33/166 (20%)<br>Lacunar<br>18/90 (20%)<br>Non-lacunar               |
| Madureira 2001          | Hospital Portugal     | 180/165                                        | 3 months                           | NP                                       | Imaging           | Dementia               | 6/139 (4.3%)<br>Lacunar<br>5/41 (12%) Non-lacunar                   |
| Klimkowicz-Mrowiec 2006 | Hospital Poland       | 173/145 <sup>H*</sup>                          | 3 months                           | NP & MMSE                                | Clinical          | Dementia               | 2/24 (8%)<br>Lacunar<br>35/149 (23%)<br>Non-lacunar                 |
| Dong 2012               | Hospital Singapore    | 300/239 <sup>A</sup>                           | 3-6 months                         | NP, MMSE, and MoCA                       | Risk factor       | Moderate MCI           | 21/106 (20%)<br>Lacunar<br>31/97 (33%)<br>Non-lacunar               |
| Tatemichi 1994          | Hospital USA          | Not stated/227                                 | 3 months                           | NP                                       | Clinical          | MCI                    | 21/59 (36%)<br>Lacunar<br>59/168 (35%)<br>Non-lacunar               |
| Tay 2006                | Hospital Singapore    | 216/169                                        | 9 days                             | MMSE                                     | Clinical          | NA                     | Mean MMSE<br>Non-lacunar (anterior circulation)18.2<br>Lacunar 22.9 |
| Mok 2004                | Hospital China        | 86/75                                          | 3 months<br>(K)                    | MMSE and Clinical Dementia Rating scale. | Imaging           | Dementia               | 10/75 (13%)<br>Mean MMSE:<br>24.8 lacunar, 27.7 healthy controls    |
| Samuelsson 1996         | Hospital Sweden       | 100/81                                         | 2 years                            | MMSE & NP if impaired.                   | Clinical          | Dementia               | 8/81 (10%)                                                          |
| Anderson 2008           | Community Australia   | Not stated/30                                  | 1 year                             | NP                                       | Clinical          | MCI                    | 2/30 (7%)                                                           |
| Loeb 1992               | Hospital Italy        | Not stated/108                                 | Up to 4 years                      | MMS E                                    | Clinical          | Dementia               | 25/108 (23%)                                                        |
| Fure 2006               | Hospital Norway       | 71/64 <sup>H</sup>                             | 2-7 days                           | NP                                       | Risk factor       | MCI                    | 41/71 (58%)                                                         |
| Barker-Collo 2012       | Community New Zealand | 357/336                                        | 5 years                            | NP                                       | Clinical          | Cognition test         | No difference in mean test scores                                   |

| <i>Reference</i> | <i>Setting</i>   | <i>Total patients consented / total tested</i> | <i>Timing of tests post-stroke</i> | <i>Test done</i>          | <i>Sub-typing</i> | <i>Primary outcome</i> | <i>Results</i>                                  |
|------------------|------------------|------------------------------------------------|------------------------------------|---------------------------|-------------------|------------------------|-------------------------------------------------|
| Appelros 2005    | Community Sweden | 253/232 <sup>A</sup>                           | 1 year                             | MMS<br>E                  | Risk factor       | Mean MMSE scores       | Mean MMSE<br>Non-lacunar 25.6<br>Lacunar 26.6   |
| Yang 2015        | Hospital China   | 1139/2078                                      | 3-6 Months                         | MMS<br>E,<br>CDR,<br>MocA | Risk Factor       | CDR                    | 15/291 5%<br>lacunar<br>51/848 6%<br>nonlacunar |

results.

(A) Includes subjects with haemorrhagic stroke / transient ischaemic attack (TIA), (B) Full neuropsychological testing, (C) Mild cognitive impairment, (D) 14 haemorrhagic strokes included in these figures, (E) Sub-type reported only in patients who had a visible lesion on CT. (F) Six subjects with specific cognitive impairment excluded, (G) Mini-Mental state (H) Data reported on subjects who could not have full tests. (I) calculated from reported odds ratio, (J) Calculated from chi-squared statistic, (K) The 61 non-demented patients were followed up 2-3 years later, no information on the outcome of those who did have dementia at 3 months<sup>264</sup>

Supplementary Figure 2 Relationship between ACE-R and NART for patients with different levels of education

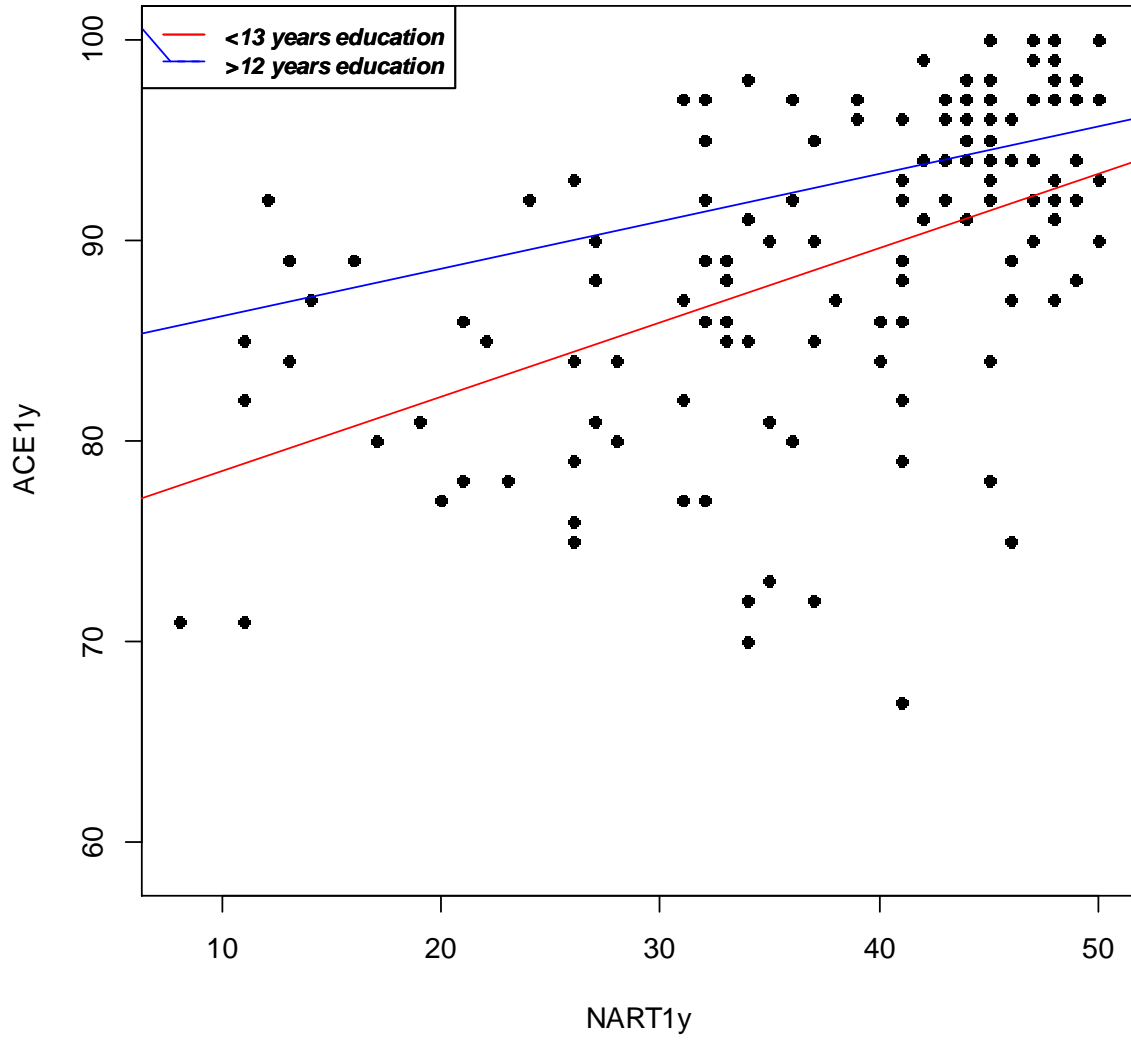

Supplementary Table 3 multiple regression of relationship between NART and Years of Education including an interaction term.

---

|                                                    | <b><i>Beta (95% CI)</i></b>    |
|----------------------------------------------------|--------------------------------|
| NART 1y                                            | 0.4 ( 95%CI: -0.095,0.89)      |
| Years of Education                                 | 0.61 ( 95%CI: -1.31,2.52)      |
| Age                                                | 0.17 ( 95%CI: -0.27,-0.72)     |
| NART 1y * Years Of<br>Education (interaction term) | -0.0028 ( 95%CI: -0.047,0.042) |

---
